# Supplementary material for: Transcaval versus Supra-Aortic Vascular Accesses for Transcatheter Aortic Valve Replacement: A Systematic Review with Meta-Analysis
Source: MDPI journal article supplement (doi:10.3390/jcm13020455), 2024-01-14
Supplement: s1 [file s1]

## Supplementary data

### Supplementary Figure S1. Search strategy

Pubmed/Medline

(Transcatheter Aortic Valve Replacement OR transcatheter aortic valve implantation OR TAVR or TAVI) AND (transcaval OR caval-aortic OR transcarotid OR carotid OR brachiocephalic OR transsubclavian OR subclavian OR transaxillary OR axillary)

Embase

('transcatheter aortic valve replacement'/exp OR 'transcatheter aortic valve replacement' OR (transcatheter AND aortic AND ('valve'/exp OR valve) AND ('replacement'/exp OR replacement))) OR 'transcatheter aortic valve implantation'/exp OR 'transcatheter aortic valve implantation' OR (transcatheter AND aortic AND ('valve'/exp OR valve) AND ('implantation'/exp OR implantation)) OR tavr OR 'tavi'/exp OR tavi) AND (transcaval OR 'caval aortic' OR transcarotid OR 'carotid'/exp OR carotid OR brachiocephalic OR transsubclavian OR subclavian OR transaxillary OR axillary)

Supplementary Table S1. Newcastle-Ottawa scale

| Study                       | Selection                             |                                      |                                 |                           | Comparability                                                   |                        | Outcomes                       |                                  | Total score |
|-----------------------------|---------------------------------------|--------------------------------------|---------------------------------|---------------------------|-----------------------------------------------------------------|------------------------|--------------------------------|----------------------------------|-------------|
|                             | Study design                          | Representativeness of exposed cohort | Selection of non-exposed cohort | Ascertainment of exposure | Comparability of cohorts on the basis of the design or analysis | Assessment of outcomes | Length of follow-up of cohorts | Adequacy of follow-up of cohorts |             |
| Paone et al. 2018<br>(15)   | restrospective<br>monocentric cohort  | *                                    | *                               | *                         | *                                                               | 0                      | *                              | *                                | 6/8         |
| Long et al. 2020<br>(16)    | restrospective<br>monocentric cohort  | *                                    | *                               | *                         | *                                                               | 0                      | *                              | *                                | 6/8         |
| Lederman et al.<br>2022 (9) | restrospective<br>multicentric cohort | *                                    | *                               | *                         | *                                                               | *                      | *                              | *                                | 7/8         |

The lack of star for the assessment of outcomes for Paone et al. and Long et al. is justified by the fact that the Valve Academic Research Consortium criteria (either 2 or 3) were not used.

Supplementary Table S2. Comparison of dichotomous baseline characteristics

| Characteristics     | Number of studies (references) | TCv |      | SAo |      | p value |
|---------------------|--------------------------------|-----|------|-----|------|---------|
|                     |                                | n   | %    | n   | %    |         |
| Male gender         | 3 (9, 15, 16)                  | 138 | 43.3 | 93  | 52.0 | 0.07    |
| HTA                 | 2 (9, 15)                      | 275 | 92.9 | 128 | 92.8 | 0.95    |
| Diabetes            | 3 (9, 15, 16)                  | 123 | 38.7 | 75  | 41.9 | 0.48    |
| Prior MI            | 2 (9, 16)                      | 64  | 24.6 | 32  | 21.8 | 0.52    |
| CABG                | 2 (9, 16)                      | 67  | 25.8 | 25  | 17.0 | 0.04    |
| AFF                 | 2 (9, 16)                      | 87  | 33.5 | 47  | 32.0 | 0.76    |
| PAD                 | 2 (15, 16)                     | 52  | 65.0 | 37  | 50.7 | 0.07    |
| Previous stroke/TIA | 3 (9, 15, 16)                  | 81  | 25.5 | 45  | 25.1 | 0.93    |
| CLD/COPD            | 3 (9, 15, 16)                  | 126 | 39.6 | 65  | 36.3 | 0.47    |
| ESRD                | 3 (9, 15, 16)                  | 26  | 8.2  | 11  | 6.1  | 0.41    |

TCV = transcaval; SAo = supra-aortic; HTA = hypertension; MI = myocardial infarction; CABG = coronary artery by-pass graft; AFF = atrial fibrillation or flutter; PAD = peripheral artery disease; TIA = transient ischemic attack; CLD = chronic lung disease; COPD = chronic obstructive pulmonary disease; ESRD = end-stage renal disease.

Supplementary Table S3. Comparison of continuous baseline characteristics

| <b>Variables</b> | <b>Number of<br/>studies<br/>(references)</b> | <b>TCv</b> | <b>SAo</b> | <b>Mean difference<br/>(95%)</b> | <b>p-value</b> |
|------------------|-----------------------------------------------|------------|------------|----------------------------------|----------------|
| Age (years)      | 3 (9, 15, 16)                                 | 77.3 ± 9.0 | 78.9 ± 8.4 | -1.4 (-2.8, -0.1)                | 0.04           |
| STS score        | 2 (15, 16)                                    | 8.3 ± 4.6  | 8.9 ± 3.9  | -0.8 (-1.8, 0.2)                 | 0.11           |

TCv = transcaval; SAo = supra-aortic; STS score = Society of Thoracic Surgeons.

Supplementary Table S4. Perioperative characteristics

| Study                       | Study arm | Sample size (n) | Moderate sedation | Procedural success | BE type of valve |
|-----------------------------|-----------|-----------------|-------------------|--------------------|------------------|
| Paone et al.<br>2018 (15)   | TCv       | 58              | -                 | -                  | 82.8             |
|                             | TC        | 32              | 0                 | -                  | 93.8             |
| Long et al.<br>2020 (16)    | TCv       | 22              | 64.6              | 100.0              | 45.4             |
|                             | TSc       | 41              | 19.5              | 100.0              | 33.1             |
| Lederman et al.<br>2022 (9) | TCv       | 238             | 45.4              | 99.2               | -                |
|                             | TAx       | 106             | 14.2              | 99.1               | -                |

TCv = transcaval; TC = transcarotid; TSc = transsubclavian; TAx = transaxillary; BE = balloon-expendable. All values are expressed as percentages (%), unless specified otherwise.

Supplementary Table S5. Comparison of perioperative characteristics

| Characteristics    | Number of studies (references) | TCv |      | SAo |      | p value |
|--------------------|--------------------------------|-----|------|-----|------|---------|
|                    |                                | n   | %    | n   | %    |         |
| Moderate sedation  | 3 (9,15,16)*                   | 122 | 46.9 | 23  | 12.8 | < 0.001 |
| Procedural success | 2 (9,16)                       | 257 | 98.8 | 146 | 99.3 | 0.64    |
| BE type of valve   | 2 (15,16)                      | 58  | 72.5 | 44  | 60.3 | 0.11    |

TCv = transcaval; SAo = supra-aortic; BE = balloon-expandable. All values are expressed as percentages (%), unless specified otherwise. \*Information on anesthesia modality in patients undergoing TCv procedures not available in Paone et al.
